# Supplementary material for: Transparent nickel selenide alloy counter electrodes for bifacial dye-sensitized solar cells exceeding 10% efficiency
Source: Royal Society of Chemistry journal article supplement (doi:10.1039/c4nr03900a), 2014-08-11
Supplement: c4nr03900a1.pdf [file c4nr03900a1.pdf]

## **Transparent nickel selenide alloy counter electrodes for bifacial dye-sensitized solar cells exceeding 10% efficiency**

Yanyan Duan<sup>a,b</sup>, Qunwei Tang<sup>a,b\*</sup>, Benlin He<sup>b</sup>, Ru Li<sup>a</sup>, Liangmin Yu<sup>a\*</sup>

<sup>a</sup> Key Laboratory of Marine Chemistry Theory and Technology, Ministry of Education, Ocean University of China, Qingdao 266100, P.R. China;

<sup>b</sup> Institute of Materials Science and Engineering, Ocean University of China, Qingdao 266100, P.R. China;

\*Corresponding author: E-mail address: tangqunwei@ouc.edu.cn; yuyan@ouc.edu.cn;

Tel/Fax: +86 532 66781690;

## Supporting figures

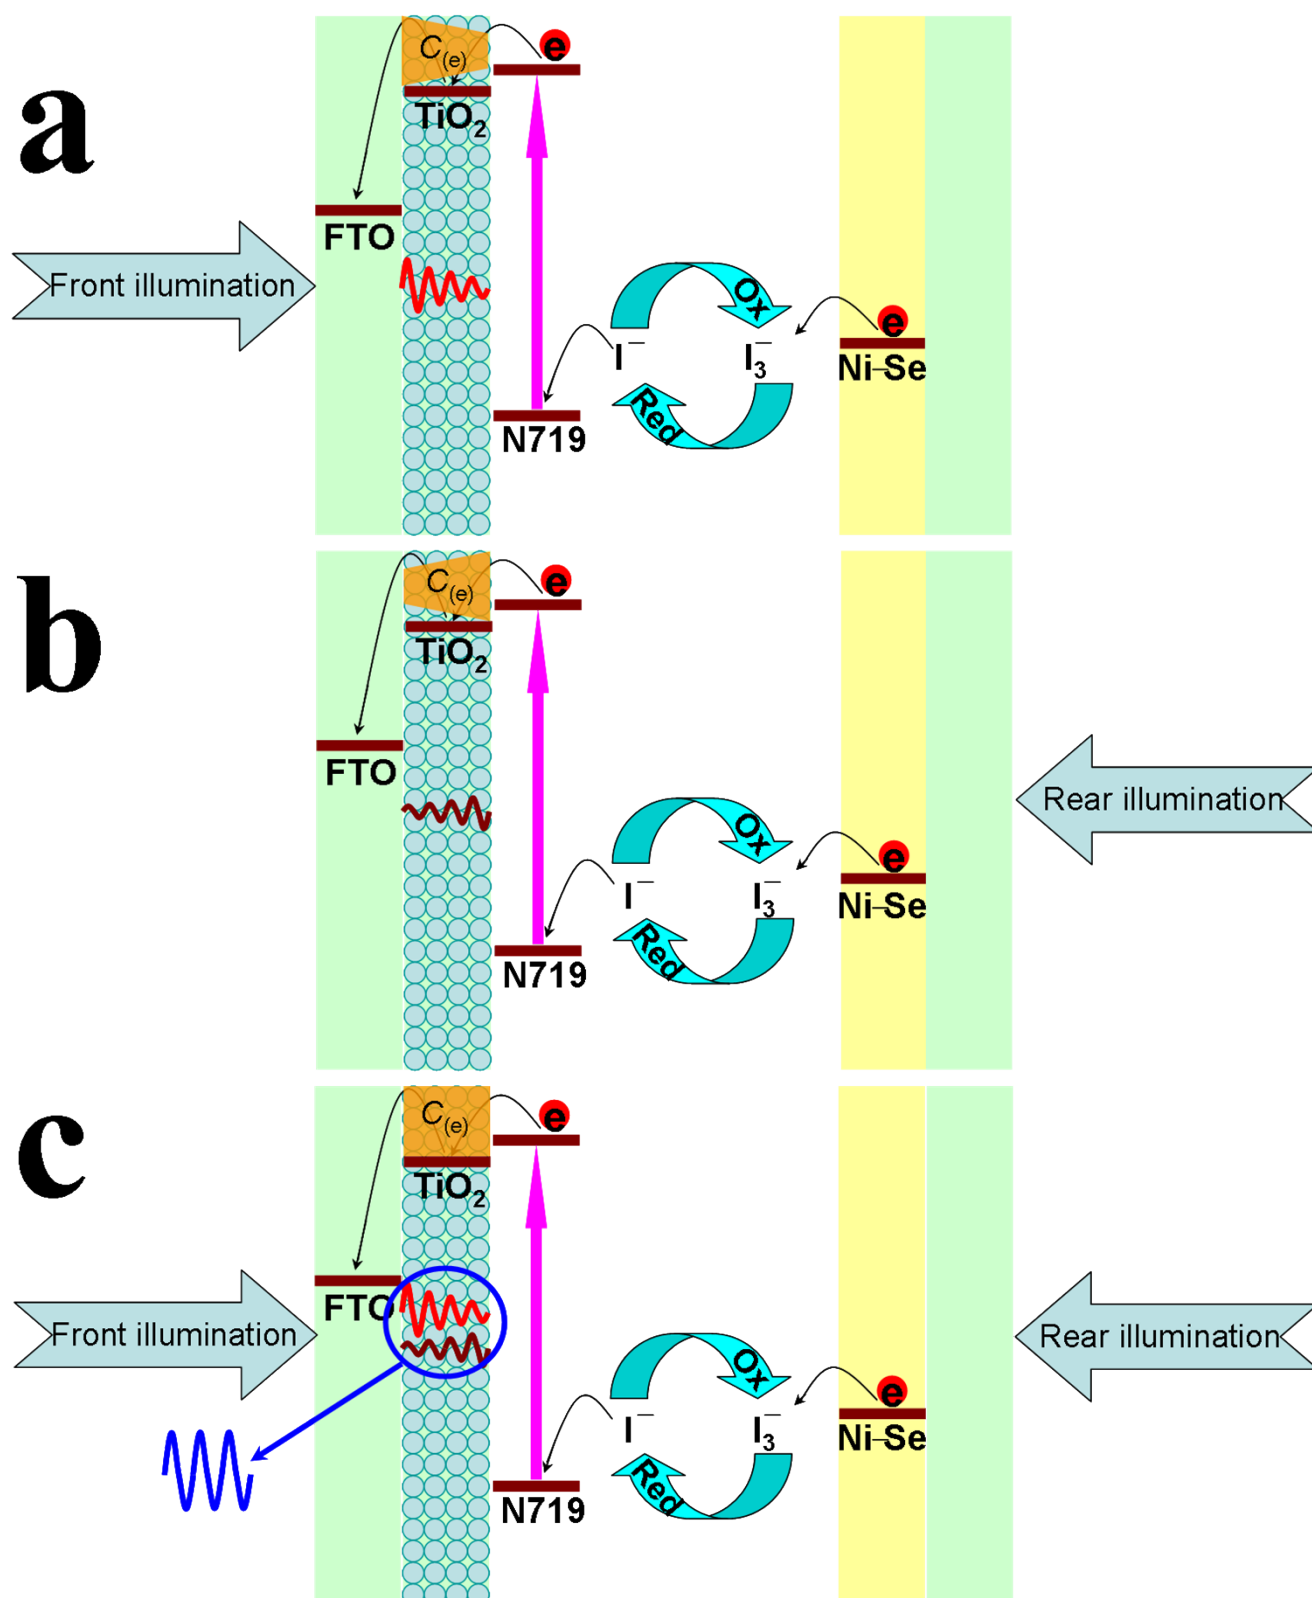

**Figure S1.** Schemes representing incident light descent and electron density on TiO<sub>2</sub> with irradiation from (a) front, (b) rear, and (c) both. The incident light intensity is controlled at 100 mW cm<sup>-2</sup> (calibrated by a standard silicon solar cell) in either side.

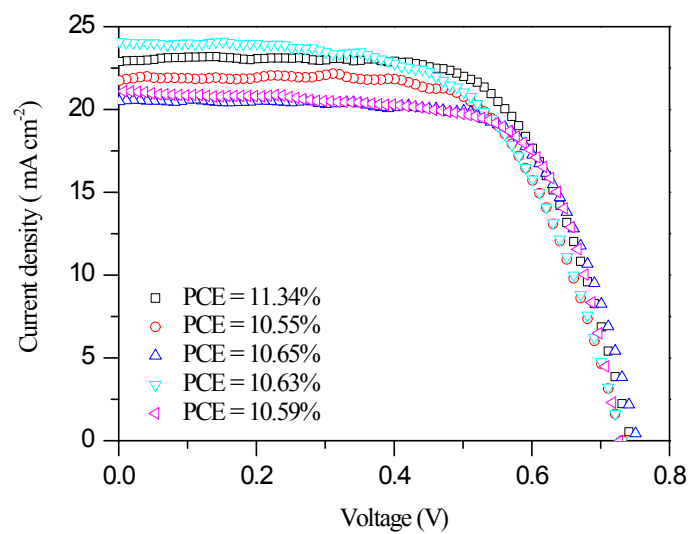

**Figure S2.** Repeated characteristic  $J$ – $V$  curves of the bifacial DSSCs employing  $\text{Ni}_{0.85}\text{Se}$  alloy CE for both irradiation. The light intensity in each side was controlled at  $100 \text{ mW cm}^{-2}$ .

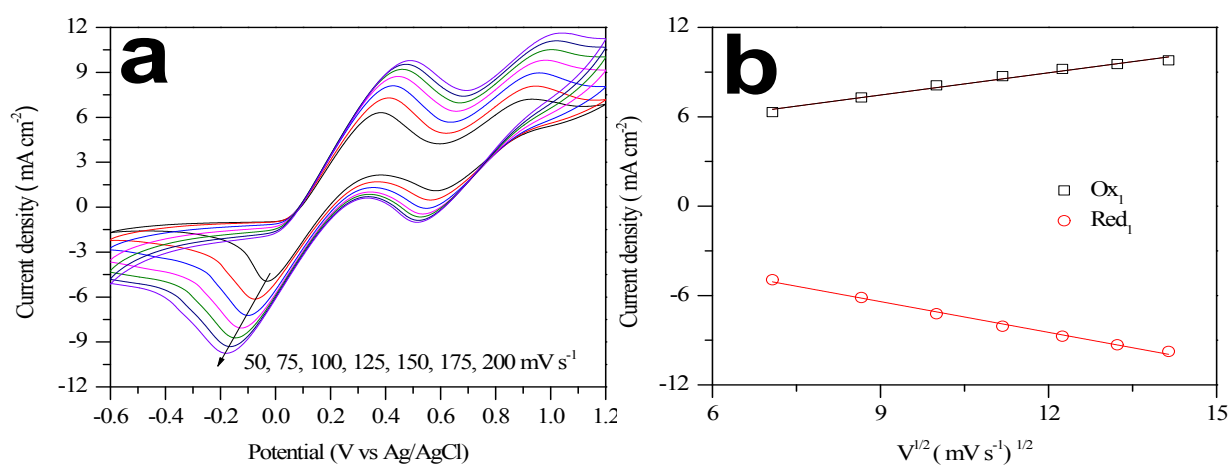

**Figure S3.** (a) CV curves of  $\text{Ni}_{0.85}\text{Se}$  CE for  $\text{I}^-/\text{I}_3^-$  redox species at varied scan rates (from inner to outer: 50, 75, 100, 125, 150, 175, and 200  $\text{mV s}^{-1}$ ), and (b) relationship between peak current density and square root of scan rates.
